# Supplementary material for: The role of the substrate structure in the on-surface synthesis of organometallic and covalent oligophenylene chains
Source: Royal Society of Chemistry journal article supplement (doi:10.1039/c6cp03551e), 2016-01-01
Supplement: c6cp03551e1.pdf [file c6cp03551e1.pdf]

## Supporting Information

for

### The role of substrate commensurability in the surface-assisted synthesis of zigzag organometallic and oligophenylene chains

Jingya Dai<sup>1</sup>, Qitang Fan<sup>1</sup>, Tao Wang<sup>1</sup>, Julian Kuttner<sup>2</sup>, Gerhard Hilt<sup>2</sup>, J. Michael Gottfried<sup>2\*</sup>,  
Junfa Zhu<sup>1\*</sup>

<sup>1</sup>National Synchrotron Radiation Laboratory and Collaborative Innovation Center of Suzhou  
Nano Science and Technology, University of Science and Technology of China, Hefei 230029,  
P.R. China, [jfzhu@ustc.edu.cn](mailto:jfzhu@ustc.edu.cn)

<sup>2</sup>Fachbereich Chemie, Philipps-Universität Marburg, Hans-Meerwein-Str., 35032 Marburg,  
Germany, [michael.gottfried@chemie.uni-marburg.de](mailto:michael.gottfried@chemie.uni-marburg.de)

#### (a) XP spectrum of Br 3p after deposition of DMTP onto Cu(110) at 300 K

C-Br bonds of DMTP undergo cleavage on Cu(110) surface at 300 K. Evidence for this reaction is provided by the XP spectra in Figure S1. The blue curve shows the Br 3p XP spectra of DMTP, which was deposited onto the Cu(110) surface at 300 K. The Br 3p<sub>5/2</sub> peak is located at 182.2 eV. This binding energy is 2.2 eV lower than that of Br in intact DMTP molecules on Cu(111).<sup>1</sup> This indicates that the chemical state of the Br atoms undergoes a dramatic change, which is attributed to the scission of C-Br bonds and the formation of a bromide like species.

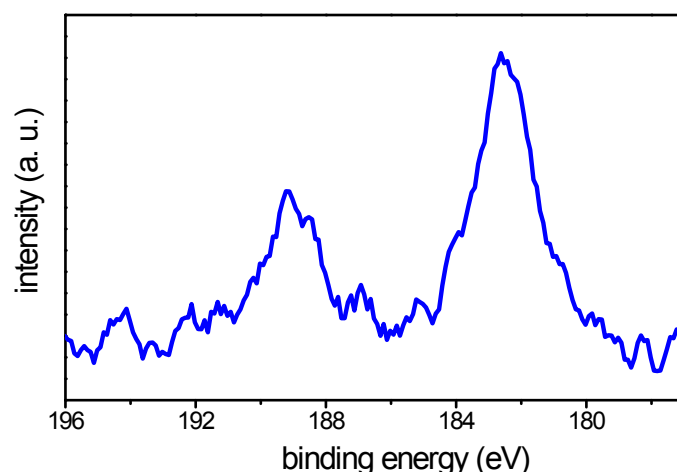

**Figure S1.** Br 3p XP spectra of 0.5 ML DMTP deposited onto Cu(110) at 300 K. XPS was performed with a VG MARK II spectrometer using a Mg K<sub>α</sub> X-ray source ( $h\nu=1253.6$  eV). The binding energies of Br 3p were referenced to the Fermi edge of clean Cu ( $E_F \equiv 0$ ).

### (b) Experimental and simulated LEED patterns

Figure S2 shows that the simulated LEED pattern corresponds well with the experimental LEED pattern.

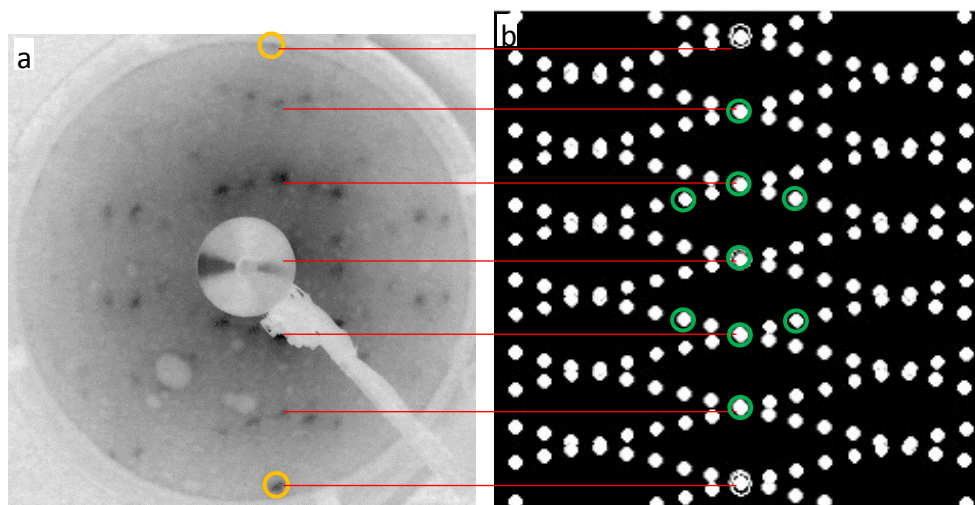

**Figure S2.** a) Experimental LEED pattern of the sample (0.84 ML DMTP deposit onto Cu(110) held at 383K). b) the simulated LEED pattern derived from the matrix of both  $(3, 1 | 0, 11)$  and  $(3, 10 | 0, 11)$ .

### References

1. Fan, Q.; Wang, C.; Liu, L.; Han, Y.; Zhao, J.; Zhu, J.; Kuttner, J.; Hilt, G.; Gottfried, J. M. Covalent, Organometallic, and Halogen-Bonded Nanomeshes from Tetrabromo-Terphenyl by Surface-Assisted Synthesis on Cu(111). *J.Phys. Chem. C* 2014, 118, 13018-13025.
